# Supplementary material
Source: PubMed Central journal article supplement (PMC2853437)
Supplement: supp_M002774_jlr.M002774-1.pdf [file supp_M002774_jlr.M002774-1.pdf]

# **Supplementary information**

**Supplementary methods**

**Supplementary references**

**Tables S1-S10**

**Figures S1-S3**

## Supplementary methods

**MS and MS/MS settings for lipidomic analysis.** The applied platform affords broad screening of multiple lipid classes from total lipid extracts within a single sample run. The column, which was kept at 50°C, was an Acquity UPLC BEH C18 10 x 50 mm with 1.7 µm particles. The binary solvent system (flow rate 0.2 ml/min) included A, water (1% 1 M NH<sub>4</sub>Ac, 0.1% HCOOH), and B, LC/MS grade (Rathburn) acetonitrile/isopropanol (5:2, 1% 1 M NH<sub>4</sub>Ac, 0.1% HCOOH). The total run time including column re-equilibration was 18 min. Mass spectrometry was carried out on Q-ToF Premier (Waters) run in ESI<sup>+</sup> mode. The data were collected over the mass range of m/z 300–1200 with scan duration of 0.2 s. The source temperature was set at 120°C, and nitrogen was used as desolvation gas (800 l/h) at 250°C. The voltages of the sampling cone and capillary were 39 V and 3.2 kV, respectively. Reserpine (50 µg/l) was used as the lock spray reference compound (5 µl/min; 10 s-scan frequency). The obtained raw centroid-data was converted into netCDF file format using Dbridge software from MassLynx (Waters, Inc.). The converted data was processed using MZmine software version 0.60 (1, 2). The lipids were quantified based on class-specific internal standards (3).

Tandem mass spectrometry (MS/MS analysis) in negative ion mode (ESI<sup>-</sup>) was used to identify the fatty acyl chains in phospholipid, PC(34:1). The collision energy has been either at 15 eV or 30 eV. The mass range starts from m/z 100. The other conditions are as in the methods described above.

## Supplementary References

1. Katajamaa, M., J. Miettinen, and M. Oresic. 2006. MZmine: toolbox for processing and visualization of mass spectrometry based molecular profile data. *Bioinformatics*: **22**: 634.
2. Katajamaa, M., and M. Oresic. 2005. Processing methods for differential analysis of LC/MS profile data. *BMC Bioinformatics* **6**: 179.
3. Laaksonen, R., M. Katajamaa, H. Paiva, M. Sysi-Aho, L. Saarinen, P. Junni, D. Lutjohann, J. Smet, R. Van Coster, T. Seppanen-Laakso, T. Lehtimaki, J. Soini, and M. Oresic. 2006. A systems biology strategy reveals biological pathways and plasma biomarker candidates for potentially toxic statin-induced changes in muscle. *PLoS ONE* **1**: e97.

**Table S1. Regression coefficients and VIP scores (> 2) for top ranked metabolites from PLS/DA analysis of serum from CONV-R compared with GF mice after a 4 h fast.**

| <b>Metabolite Name</b>        | <b>Regression coefficient</b> | <b>VIP Scores</b> |
|-------------------------------|-------------------------------|-------------------|
| Campesterol                   | -0.01333                      | 4.71966           |
| N-Acetyl Glycine              | 0.01326                       | 4.66826           |
| 3-Hydroxyphenylpropionic acid | -0.01293                      | 4.44039           |
| Fumaric acid                  | -0.01251                      | 4.15351           |
| Cholest-5-ene                 | 0.01222                       | 3.96698           |
| L-Ornithine                   | 0.01221                       | 3.96154           |
| Malic acid                    | -0.01217                      | 3.93633           |
| Maltose                       | -0.01209                      | 3.88332           |
| Glucopyranose                 | -0.01202                      | 3.83384           |
| Glucuronic acid               | -0.01179                      | 3.69115           |
| L-Proline                     | -0.01164                      | 3.59567           |
| Rhamnose                      | -0.01133                      | 3.40603           |
| Urea                          | 0.01122                       | 3.34312           |
| Palmitic acid                 | 0.01108                       | 3.26106           |
| Dopamine                      | -0.01086                      | 3.12937           |
| 2-Hydroxybutyric acid         | 0.01085                       | 3.12645           |
| Cholesterol                   | 0.01078                       | 3.08790           |
| Dodecanamide                  | 0.01050                       | 2.92707           |
| TAMP                          | -0.01027                      | 2.80278           |
| Tyramine                      | -0.01024                      | 2.78710           |
| Pyruvic acid                  | -0.00996                      | 2.63485           |
| Valine                        | 0.00990                       | 2.60474           |
| L-Tryptophan                  | 0.00962                       | 2.45712           |
| Benzenepropanoic acid         | -0.00929                      | 2.29408           |
| Citric acid                   | -0.00919                      | 2.24202           |
| Ribose                        | 0.00915                       | 2.22393           |
| 2-Propanamine                 | -0.00911                      | 2.20263           |
| Hexadecanenitrile             | -0.00905                      | 2.17511           |
| Linoleic acid                 | 0.00894                       | 2.12067           |
| Limonene                      | 0.00889                       | 2.09876           |
| Dodecanamide                  | -0.00879                      | 2.04956           |
| Furanone                      | 0.00874                       | 2.02955           |
| Hypoxantine                   | -0.00871                      | 2.01665           |
| Glycine                       | 0.00868                       | 2.00176           |

**Table S2. Fold change values  $\pm$  SEM of serum metabolites that are significantly regulated ( $p < 0.05$ ; two-tailed  $t$ -test) in CONV-R compared with GF mice after a 4 h fast.**

| Metabolite Name                        | Fold change<br>(CONV-R/GF) |            | p-value |
|----------------------------------------|----------------------------|------------|---------|
| Limonene                               | 0.38                       | $\pm 0.11$ | 0.0469  |
| Valine                                 | 0.55                       | $\pm 0.12$ | 0.0210  |
| L-Ornithine                            | 0.57                       | $\pm 0.02$ | 0.0008  |
| Cholest-5-ene                          | 0.59                       | $\pm 0.05$ | 0.0008  |
| 2-Hydroxybutyric acid                  | 0.63                       | $\pm 0.06$ | 0.0078  |
| Cholesterol                            | 0.65                       | $\pm 0.08$ | 0.0085  |
| L-Tryptophan                           | 0.67                       | $\pm 0.05$ | 0.0269  |
| Palmitic acid                          | 0.69                       | $\pm 0.07$ | 0.0059  |
| Urea                                   | 0.72                       | $\pm 0.05$ | 0.0049  |
| Ribose                                 | 0.74                       | $\pm 0.04$ | 0.0388  |
| Dodecanamide                           | 0.80                       | $\pm 0.04$ | 0.0117  |
| Linoleic acid                          | 0.80                       | $\pm 0.06$ | 0.0454  |
| Rhamnose                               | 1.26                       | $\pm 0.05$ | 0.0042  |
| Citric acid                            | 1.27                       | $\pm 0.08$ | 0.0378  |
| Hexadecanenitrile                      | 1.29                       | $\pm 0.10$ | 0.0418  |
| L-Proline                              | 1.30                       | $\pm 0.03$ | 0.0026  |
| Pyruvic acid                           | 1.34                       | $\pm 0.10$ | 0.0200  |
| Tyramine                               | 1.40                       | $\pm 0.06$ | 0.0152  |
| Benzenepropanoic acid                  | 1.60                       | $\pm 0.18$ | 0.0349  |
| Fumaric acid                           | 1.60                       | $\pm 0.07$ | 0.0004  |
| Dopamine                               | 1.64                       | $\pm 0.12$ | 0.0078  |
| Malic acid                             | 1.80                       | $\pm 0.08$ | 0.0009  |
| TAMP                                   | 1.90                       | $\pm 0.27$ | 0.0148  |
| Campesterol                            | 1.98                       | $\pm 0.08$ | 0.0000  |
| Glucose                                | 2.32                       | $\pm 0.24$ | 0.0013  |
| Glucuronic Acid                        | 2.58                       | $\pm 0.34$ | 0.0020  |
| Maltose                                | 2.59                       | $\pm 0.17$ | 0.0011  |
| (2,4,6-Trimethylphenoxy)-2-Propanamine | 3.26                       | $\pm 0.83$ | 0.0401  |
| 3-Hydroxyphenylpropionic acid          | 52.62                      | $\pm 7.20$ | 0.0001  |

False Discovery Rate  $q$ -value  $< 0.30$

**Table S3. Regression coefficients and VIP scores (> 2) for top ranked lipid molecular species from PLS/DA analysis of serum from CONV-R compared with GF mice after a 4 h fast.**

| <b>LipidName</b> | <b>Regression coefficient</b> | <b>VIP Scores</b> |
|------------------|-------------------------------|-------------------|
| PC(38:6)         | -0.0079                       | 4.6947            |
| PC(38:6)         | -0.0078                       | 4.5754            |
| PC(34:1)         | -0.0078                       | 4.5298            |
| PA/PG(38:4)      | -0.0078                       | 4.5248            |
| PS(36:0)         | -0.0078                       | 4.5055            |
| SM(d18:1/22:0)   | -0.0077                       | 4.4714            |
| LysoPC(20:0)     | 0.0077                        | 4.4176            |
| PC(34:3)         | -0.0076                       | 4.3198            |
| PC(32:1)         | -0.0074                       | 4.0516            |
| PC(38:7)         | -0.0073                       | 3.9759            |
| PC(38:7e)        | -0.0072                       | 3.8374            |
| TG(50:0)         | 0.0070                        | 3.7061            |
| SM(d18:1/22:0)   | -0.0070                       | 3.7037            |
| ChoE(22:4)       | -0.0070                       | 3.6252            |
| ChoE(22:6)       | -0.0069                       | 3.5439            |
| PC(38:3)         | -0.0068                       | 3.4461            |
| PC(34:3)         | -0.0068                       | 3.4247            |
| PE(38:6)         | -0.0067                       | 3.3957            |
| SM(d18:1/23:0)   | -0.0067                       | 3.3405            |
| PC(34:1)         | -0.0067                       | 3.3286            |
| PA/PG(38:4)      | -0.0066                       | 3.2417            |
| PC(42:10)        | -0.0065                       | 3.1551            |
| PC(38:6)         | -0.0065                       | 3.1312            |
| SM(d18:1/16:1)   | -0.0064                       | 3.0806            |
| PA/PG(36:2)      | 0.0064                        | 3.0185            |
| PC(36:5)         | 0.0063                        | 3.0037            |
| TG(52:1)         | 0.0063                        | 2.9167            |
| PC(42:9)         | -0.0062                       | 2.8650            |
| TG(48:0)         | 0.0061                        | 2.7490            |
| PC(42:9)         | -0.0061                       | 2.7459            |
| PC(36:2)         | 0.0060                        | 2.7149            |
| LysoPC(18:3)     | -0.0060                       | 2.7011            |
| PC(38:3)         | -0.0059                       | 2.6216            |
| PC(38:7)         | 0.0059                        | 2.6160            |
| SM(d18:1/24:1)   | -0.0059                       | 2.6078            |
| PC(40:7)         | -0.0059                       | 2.5817            |
| PC(38:3)         | -0.0059                       | 2.5708            |
| PC(40:6)         | -0.0059                       | 2.5545            |
| TG(54:5)         | 0.0058                        | 2.5392            |
| LysoPC(22:6)     | -0.0058                       | 2.5213            |
| TG(54:5)         | 0.0058                        | 2.5036            |
| TG(54:6)         | 0.0056                        | 2.3105            |
| PC(38:7)         | -0.0055                       | 2.2657            |
| TG(48:4)         | 0.0055                        | 2.2525            |
| PC(36:4)         | -0.0055                       | 2.2471            |
| LysoPC(16:1)     | -0.0055                       | 2.2207            |

|              |         |        |
|--------------|---------|--------|
| PC(36:4)     | -0.0054 | 2.1759 |
| PC(38:4)     | -0.0054 | 2.1476 |
| PC(36:4)     | 0.0053  | 2.1167 |
| TG(54:4)     | 0.0053  | 2.1093 |
| PC(42:6)     | -0.0053 | 2.1062 |
| PC(42:8)     | -0.0053 | 2.0995 |
| TG(54:7)     | 0.0053  | 2.0827 |
| PC(42:7)     | -0.0052 | 2.0331 |
| LysoPC(18:3) | -0.0052 | 2.0235 |
| ChoE(16:1)   | -0.0052 | 2.0197 |
| PE(40:6)     | -0.0052 | 2.0022 |

**Table S4. Absolute concentrations  $\pm$  SEM of the significantly altered lipid molecular species ( $\mu\text{mol/ml}$ ) in serum from CONV-R, CONV-D, and GF mice after a 4 h fast**

| <b>Lipid Name</b> | <b>GF</b>           | <b>CONV-R</b>                    | <b>CONV-D</b>                      |
|-------------------|---------------------|----------------------------------|------------------------------------|
| ChoE(16:0)        | 0.0029 $\pm$ 0.0002 | 0.0034 $\pm$ 0.0001              | 0.0020 $\pm$ 0.0003 <sup>e</sup>   |
| ChoE(18:1)        | 0.0123 $\pm$ 0.0014 | 0.0161 $\pm$ 0.0019              | 0.0086 $\pm$ 0.0014 <sup>d</sup>   |
| ChoE(22:4)        | 0.0020 $\pm$ 0.0002 | 0.0037 $\pm$ 0.0004 <sup>b</sup> | 0.0032 $\pm$ 0.0004 <sup>b</sup>   |
| ChoE(22:6)        | 0.0458 $\pm$ 0.0038 | 0.0722 $\pm$ 0.0046 <sup>b</sup> | 0.0430 $\pm$ 0.0054 <sup>e</sup>   |
| PA/PG(36:2)       | 0.0019 $\pm$ 0.0001 | 0.0014 $\pm$ 0.0001              | 0.0014 $\pm$ 0.0002 <sup>a</sup>   |
| PA/PG(36:2)       | 0.0011 $\pm$ 0.0001 | 0.0009 $\pm$ 0.0001              | 0.0007 $\pm$ 0.0001 <sup>a</sup>   |
| PA/PG(36:4)       | 0.0017 $\pm$ 0.0001 | 0.0019 $\pm$ 0.0001              | 0.0013 $\pm$ 0.0001 <sup>d</sup>   |
| PA/PG(38:4)       | 0.0008 $\pm$ 0.0000 | 0.0010 $\pm$ 0.0000 <sup>a</sup> | 0.0008 $\pm$ 0.0001                |
| PA/PG(38:4)       | 0.0075 $\pm$ 0.0001 | 0.0101 $\pm$ 0.0004 <sup>c</sup> | 0.0063 $\pm$ 0.0009 <sup>f</sup>   |
| PC(32:1)          | 0.0036 $\pm$ 0.0002 | 0.0052 $\pm$ 0.0003 <sup>b</sup> | 0.0037 $\pm$ 0.0004 <sup>b</sup>   |
| PC(32:2)          | 0.0016 $\pm$ 0.0001 | 0.0020 $\pm$ 0.0001              | 0.0013 $\pm$ 0.0002 <sup>d</sup>   |
| PC(34:1)          | 0.0184 $\pm$ 0.0010 | 0.0261 $\pm$ 0.0019 <sup>a</sup> | 0.0227 $\pm$ 0.0026                |
| PC(34:1)          | 0.1486 $\pm$ 0.0036 | 0.2232 $\pm$ 0.0128 <sup>b</sup> | 0.1721 $\pm$ 0.0171 <sup>e</sup>   |
| PC(34:3)          | 0.0129 $\pm$ 0.0005 | 0.0185 $\pm$ 0.0009 <sup>b</sup> | 0.0128 $\pm$ 0.0015 <sup>e</sup>   |
| PC(34:3)          | 0.0016 $\pm$ 0.0001 | 0.0023 $\pm$ 0.0002 <sup>b</sup> | 0.0016 $\pm$ 0.0002 <sup>e</sup>   |
| PC(36:0)          | 0.0017 $\pm$ 0.0001 | 0.0015 $\pm$ 0.0001              | 0.0014 $\pm$ 0.0001 <sup>a</sup>   |
| PC(36:2)          | 0.6085 $\pm$ 0.0194 | 0.4926 $\pm$ 0.0336 <sup>a</sup> | 0.4812 $\pm$ 0.0425 <sup>a</sup>   |
| PC(36:3)          | 0.1126 $\pm$ 0.0054 | 0.1227 $\pm$ 0.0070              | 0.0951 $\pm$ 0.0083 <sup>d</sup>   |
| PC(36:4)          | 0.0871 $\pm$ 0.0052 | 0.0653 $\pm$ 0.0066              | 0.0553 $\pm$ 0.0087 <sup>b</sup>   |
| PC(36:5)          | 0.0298 $\pm$ 0.0011 | 0.0285 $\pm$ 0.0022 <sup>a</sup> | 0.0223 $\pm$ 0.0026 <sup>a</sup>   |
| PC(36:5)          | 0.0028 $\pm$ 0.0001 | 0.0021 $\pm$ 0.0002              | 0.0019 $\pm$ 0.0002 <sup>b</sup>   |
| PC(38:2)          | 0.0142 $\pm$ 0.0006 | 0.0135 $\pm$ 0.0010              | 0.0105 $\pm$ 0.0009 <sup>b</sup>   |
| PC(38:3)          | 0.0014 $\pm$ 0.0000 | 0.0017 $\pm$ 0.0001 <sup>a</sup> | 0.0013 $\pm$ 0.0001 <sup>e</sup>   |
| PC(38:3)          | 0.0470 $\pm$ 0.0015 | 0.0606 $\pm$ 0.0051 <sup>b</sup> | 0.0410 $\pm$ 0.0038 <sup>e</sup>   |
| PC(38:3)          | 0.0014 $\pm$ 0.0000 | 0.0017 $\pm$ 0.0001 <sup>b</sup> | 0.0013 $\pm$ 0.0001 <sup>d</sup>   |
| PC(38:4)          | 0.0015 $\pm$ 0.0000 | 0.0019 $\pm$ 0.0002 <sup>a</sup> | 0.0014 $\pm$ 0.0001 <sup>d</sup>   |
| PC(38:4)          | 0.0087 $\pm$ 0.0003 | 0.0106 $\pm$ 0.0009              | 0.0079 $\pm$ 0.0008 <sup>d</sup>   |
| PC(38:6)          | 0.1828 $\pm$ 0.0060 | 0.2651 $\pm$ 0.0113 <sup>b</sup> | 0.1950 $\pm$ 0.0198 <sup>e</sup>   |
| PC(38:6)          | 0.0205 $\pm$ 0.0009 | 0.0313 $\pm$ 0.0011 <sup>c</sup> | 0.0223 $\pm$ 0.0023 <sup>f</sup>   |
| PC(38:7)          | 0.0100 $\pm$ 0.0007 | 0.0079 $\pm$ 0.0012 <sup>a</sup> | 0.0060 $\pm$ 0.0010                |
| PC(38:7)          | 0.0010 $\pm$ 0.0000 | 0.0014 $\pm$ 0.0002 <sup>a</sup> | 0.0010 $\pm$ 0.0001 <sup>a,e</sup> |
| PC(38:7)          | 0.0018 $\pm$ 0.0001 | 0.0012 $\pm$ 0.0001              | 0.0012 $\pm$ 0.0001 <sup>b</sup>   |
| PC(38:7)          | 0.0014 $\pm$ 0.0001 | 0.0019 $\pm$ 0.0001 <sup>c</sup> | 0.0012 $\pm$ 0.0001 <sup>f</sup>   |
| PC(40:4)          | 0.0035 $\pm$ 0.0002 | 0.0034 $\pm$ 0.0002              | 0.0025 $\pm$ 0.0002 <sup>b,e</sup> |
| PC(40:3)          | 0.0011 $\pm$ 0.0001 | 0.0013 $\pm$ 0.0001              | 0.0010 $\pm$ 0.0001 <sup>d</sup>   |
| PC(40:5)          | 0.0020 $\pm$ 0.0001 | 0.0019 $\pm$ 0.0001              | 0.0015 $\pm$ 0.0002 <sup>a</sup>   |
| PC(40:6)          | 0.0913 $\pm$ 0.0031 | 0.1149 $\pm$ 0.0086 <sup>b</sup> | 0.0829 $\pm$ 0.0074 <sup>e</sup>   |
| PC(40:7)          | 0.0037 $\pm$ 0.0009 | 0.0065 $\pm$ 0.0005              | 0.0026 $\pm$ 0.0006 <sup>d</sup>   |
| PC(40:8)          | 0.0046 $\pm$ 0.0001 | 0.0053 $\pm$ 0.0004              | 0.0040 $\pm$ 0.0003 <sup>d</sup>   |
| PC(40:9)          | 0.0017 $\pm$ 0.0001 | 0.0015 $\pm$ 0.0001              | 0.0012 $\pm$ 0.0001 <sup>a</sup>   |
| PC(42:10)         | 0.0023 $\pm$ 0.0001 | 0.0030 $\pm$ 0.0001 <sup>a</sup> | 0.0022 $\pm$ 0.0002 <sup>d</sup>   |
| PC(42:6)          | 0.0028 $\pm$ 0.0001 | 0.0036 $\pm$ 0.0003 <sup>b</sup> | 0.0024 $\pm$ 0.0002 <sup>e</sup>   |
| PC(42:7)          | 0.0017 $\pm$ 0.0001 | 0.0021 $\pm$ 0.0001              | 0.0014 $\pm$ 0.0001 <sup>c</sup>   |
| PC(42:8)          | 0.0007 $\pm$ 0.0000 | 0.0009 $\pm$ 0.0001              | 0.0006 $\pm$ 0.0001 <sup>d</sup>   |
| PC(42:9)          | 0.0004 $\pm$ 0.0000 | 0.0005 $\pm$ 0.0000 <sup>b</sup> | 0.0003 $\pm$ 0.0000 <sup>e</sup>   |
| PC(42:9)          | 0.0112 $\pm$ 0.0005 | 0.0140 $\pm$ 0.0006 <sup>b</sup> | 0.0095 $\pm$ 0.0010 <sup>e</sup>   |
| PE(36:3)          | 0.0067 $\pm$ 0.0004 | 0.0072 $\pm$ 0.0004              | 0.0085 $\pm$ 0.0003 <sup>a</sup>   |



|                |                 |                              |                              |
|----------------|-----------------|------------------------------|------------------------------|
| PE(36:5e)      | 0.0059 ± 0.0005 | 0.0064 ± 0.0005              | 0.0083 ± 0.0006 <sup>a</sup> |
| PE(38:6)       | 0.0114 ± 0.0011 | 0.0212 ± 0.0025 <sup>b</sup> | 0.0143 ± 0.0009 <sup>f</sup> |
| PS(36:0)       | 0.0015 ± 0.0000 | 0.0024 ± 0.0002 <sup>c</sup> | 0.0017 ± 0.0001 <sup>f</sup> |
| LysoPC(18:0)   | 0.0086 ± 0.0003 | 0.0072 ± 0.0006              | 0.0062 ± 0.0006 <sup>b</sup> |
| LysoPC(18:2e)  | 0.0042 ± 0.0003 | 0.0036 ± 0.0002              | 0.0030 ± 0.0003 <sup>a</sup> |
| LysoPC(20:0)   | 0.0067 ± 0.0002 | 0.0051 ± 0.0002 <sup>c</sup> | 0.0043 ± 0.0005 <sup>c</sup> |
| LysoPC(20:3e)  | 0.0220 ± 0.0016 | 0.0175 ± 0.0013              | 0.0144 ± 0.0015 <sup>b</sup> |
| LysoPE(22:0)   | 0.0041 ± 0.0002 | 0.0035 ± 0.0005              | 0.0028 ± 0.0003 <sup>a</sup> |
| SM(d18:1/22:0) | 0.0011 ± 0.0000 | 0.0018 ± 0.0002 <sup>b</sup> | 0.0013 ± 0.0001 <sup>e</sup> |
| SM(d18:1/22:0) | 0.0076 ± 0.0002 | 0.0118 ± 0.0007 <sup>c</sup> | 0.0085 ± 0.0006 <sup>f</sup> |
| SM(d18:1/23:0) | 0.0019 ± 0.0000 | 0.0023 ± 0.0001 <sup>b</sup> | 0.0018 ± 0.0001 <sup>e</sup> |
| TG(46:1)       | 0.0025 ± 0.0003 | 0.0014 ± 0.0002 <sup>a</sup> | 0.0014 ± 0.0001 <sup>a</sup> |
| TG(48:0)       | 0.0099 ± 0.0009 | 0.0060 ± 0.0006 <sup>b</sup> | 0.0067 ± 0.0007 <sup>b</sup> |
| TG(48:1)       | 0.0144 ± 0.0021 | 0.0086 ± 0.0014              | 0.0065 ± 0.0013 <sup>a</sup> |
| TG(48:2)       | 0.0179 ± 0.0023 | 0.0130 ± 0.0017              | 0.0097 ± 0.0018 <sup>a</sup> |
| TG(50:0)       | 0.0048 ± 0.0004 | 0.0025 ± 0.0002 <sup>c</sup> | 0.0028 ± 0.0004 <sup>c</sup> |
| TG(50:1)       | 0.0642 ± 0.0092 | 0.0400 ± 0.0049              | 0.0322 ± 0.0054 <sup>a</sup> |
| TG(50:5)       | 0.0040 ± 0.0005 | 0.0027 ± 0.0004              | 0.0023 ± 0.0002 <sup>a</sup> |
| TG(52:1)       | 0.0226 ± 0.0023 | 0.0118 ± 0.0015 <sup>b</sup> | 0.0109 ± 0.0019 <sup>b</sup> |
| TG(54:2)       | 0.0240 ± 0.0029 | 0.0150 ± 0.0015              | 0.0129 ± 0.0019 <sup>b</sup> |
| TG(54:4)       | 0.4401 ± 0.0527 | 0.2543 ± 0.0313 <sup>b</sup> | 0.2373 ± 0.0403 <sup>b</sup> |
| TG(54:5)       | 0.0416 ± 0.0051 | 0.0213 ± 0.0024 <sup>b</sup> | 0.0215 ± 0.0021 <sup>b</sup> |
| TG(54:5)       | 0.5405 ± 0.0640 | 0.2725 ± 0.0422 <sup>b</sup> | 0.2722 ± 0.0343 <sup>b</sup> |
| TG(54:6)       | 0.2543 ± 0.0404 | 0.1066 ± 0.0132 <sup>b</sup> | 0.1013 ± 0.0117 <sup>b</sup> |
| TG(54:7)       | 0.0598 ± 0.0072 | 0.0502 ± 0.0066 <sup>a</sup> | 0.0334 ± 0.0041 <sup>a</sup> |
| TG(54:7)       | 0.0348 ± 0.0048 | 0.0183 ± 0.0028              | 0.0164 ± 0.0014 <sup>b</sup> |
| TG(56:4)       | 0.0280 ± 0.0043 | 0.0195 ± 0.0027              | 0.0142 ± 0.0020 <sup>a</sup> |
| TG(56:5)       | 0.0305 ± 0.0037 | 0.0212 ± 0.0024              | 0.0193 ± 0.0022 <sup>a</sup> |
| TG(56:9)       | 0.0261 ± 0.0027 | 0.0281 ± 0.0041              | 0.0162 ± 0.0018 <sup>d</sup> |
| TG(58:10)      | 0.0434 ± 0.0048 | 0.0393 ± 0.0048              | 0.0271 ± 0.0028 <sup>a</sup> |

<sup>a</sup> p - Value < 0.05 vs GF

<sup>b</sup> p - Value < 0.01 vs GF

<sup>c</sup> p - Value < 0.001 vs GF

<sup>d</sup> p - Value < 0.05 CONV-R vs CONV-D

<sup>e</sup> p - Value < 0.01 CONV-R vs CONV-D

<sup>f</sup> p - Value < 0.001 CONV-R vs CONV-D

q - Value < 0.20

**Table S5. Regression coefficients and VIP scores (> 2) for top ranked lipid molecular species from PLS/DA analysis of white adipose tissue from CONV-R compared with GF mice after a 4h fast**

| <b>Lipid Name</b> | <b>Regression coefficient</b> | <b>VIP Scores</b> |
|-------------------|-------------------------------|-------------------|
| TG(58:9)          | -0.0208                       | 5.7926            |
| TG(56:8)          | -0.0208                       | 5.7503            |
| TG(56:7)          | -0.0206                       | 5.6641            |
| TG(58:10)         | -0.0200                       | 5.3600            |
| TG(58:8)          | -0.0197                       | 5.2000            |
| TG(56:8)          | -0.0182                       | 4.4125            |
| TG(56:9)          | -0.0180                       | 4.3147            |
| TG(58:8)          | -0.0165                       | 3.6327            |
| TG(56:7)          | -0.0162                       | 3.5127            |
| TG(53:5)          | 0.0162                        | 3.5029            |
| TG(56:7)          | -0.0161                       | 3.4710            |
| TG(56:6)          | -0.0155                       | 3.2076            |
| TG(48:0)          | -0.0155                       | 3.2031            |
| PC(36:2)          | 0.0149                        | 2.9472            |
| TG(45:1)          | 0.0135                        | 2.4297            |
| TG(50:2)          | -0.0132                       | 2.3297            |

**Table S6. Absolute concentrations  $\pm$  SEM of the significantly altered lipid molecular species ( $\mu\text{mol/g}$ ) in white adipose tissue from CONV-R and GF mice after a 4h fast.**

| <b>Lipid Name</b> | <b>GF</b>            | <b>CONV-R</b>        | <b>p-value</b> |
|-------------------|----------------------|----------------------|----------------|
| PC(36:2)          | 0.1833 $\pm$ 0.0150  | 0.1227 $\pm$ 0.0146  | 0.0219         |
| TG(45:1)          | 0.9120 $\pm$ 0.0436  | 0.6400 $\pm$ 0.1438  | 0.0419         |
| TG(48:0)          | 1.8188 $\pm$ 0.1542  | 2.6612 $\pm$ 0.2950  | 0.0156         |
| TG(50:2)          | 34.8757 $\pm$ 3.1091 | 46.7047 $\pm$ 4.5207 | 0.0473         |
| TG(53:5)          | 0.1394 $\pm$ 0.0123  | 0.0819 $\pm$ 0.0121  | 0.0103         |
| TG(56:6)          | 0.2882 $\pm$ 0.0373  | 0.4776 $\pm$ 0.0609  | 0.0155         |
| TG(56:7)          | 0.2093 $\pm$ 0.0198  | 0.3646 $\pm$ 0.0147  | 0.0002         |
| TG(56:7)          | 0.3190 $\pm$ 0.0443  | 0.5688 $\pm$ 0.0767  | 0.0101         |
| TG(56:7)          | 0.3271 $\pm$ 0.0435  | 0.5713 $\pm$ 0.0763  | 0.0108         |
| TG(56:8)          | 0.2322 $\pm$ 0.0277  | 0.5045 $\pm$ 0.0449  | 0.0001         |
| TG(56:8)          | 0.2245 $\pm$ 0.0303  | 0.4454 $\pm$ 0.0563  | 0.0025         |
| TG(56:9)          | 0.0710 $\pm$ 0.0052  | 0.1268 $\pm$ 0.0183  | 0.0029         |
| TG(58:10)         | 0.0369 $\pm$ 0.0047  | 0.0861 $\pm$ 0.0108  | 0.0004         |
| TG(58:8)          | 0.0808 $\pm$ 0.0103  | 0.1653 $\pm$ 0.0157  | 0.0005         |
| TG(58:8)          | 0.0801 $\pm$ 0.0117  | 0.1472 $\pm$ 0.0196  | 0.0085         |
| TG(58:9)          | 0.1201 $\pm$ 0.0135  | 0.2576 $\pm$ 0.0231  | 0.0001         |

q – Value < 0.40

**Table S7. Regression coefficients and VIP scores (> 2) for top ranked lipid molecular species from PLS/DA analysis of livers from CONV-R compared with GF mice after a 4 h fast**

| <b>LipidName</b> | <b>Regression coefficient</b> | <b>VIP Scores</b> |
|------------------|-------------------------------|-------------------|
| TG(56:6)         | -0.003650                     | 4.057269          |
| TG(50:1)         | -0.003526                     | 3.787626          |
| TG(62:12)        | -0.003504                     | 3.739842          |
| TG(56:7)         | -0.003426                     | 3.575722          |
| TG(58:9)         | -0.003405                     | 3.531735          |
| TG(56:2)         | -0.003342                     | 3.402796          |
| TG(50:3)         | -0.003335                     | 3.388653          |
| TG(58:4)         | -0.003324                     | 3.365047          |
| TG(58:7)         | -0.003306                     | 3.329741          |
| TG(56:3)         | -0.003303                     | 3.324215          |
| TG(53:2)         | -0.003297                     | 3.312113          |
| TG(54:7)         | -0.003295                     | 3.306421          |
| TG(56:2)         | -0.003256                     | 3.229391          |
| TG(60:11)        | -0.003248                     | 3.213960          |
| TG(51:2)         | -0.003236                     | 3.188878          |
| TG(54:1)         | -0.003231                     | 3.180070          |
| TG(58:3)         | -0.003230                     | 3.178869          |
| TG(60:12)        | -0.003208                     | 3.134931          |
| TG(60:11)        | -0.003196                     | 3.111664          |
| TG(50:2)         | -0.003195                     | 3.109680          |
| TG(52:5)         | -0.003178                     | 3.076230          |
| PC(32:1)         | -0.003168                     | 3.056970          |
| TG(56:5)         | -0.003137                     | 2.997715          |
| TG(54:5)         | -0.003128                     | 2.979506          |
| TG(62:8)         | -0.003119                     | 2.964155          |
| TG(54:2)         | -0.003107                     | 2.939926          |
| PE(46:9e)        | -0.003098                     | 2.923530          |
| TG(60:10)        | -0.003093                     | 2.914151          |
| TG(60:6)         | -0.003075                     | 2.880559          |
| TG(52:1)         | -0.003063                     | 2.857108          |
| TG(51:1)         | -0.003053                     | 2.838312          |
| TG(55:3)         | -0.003038                     | 2.811982          |
| TG(51:3)         | -0.003036                     | 2.806846          |
| TG(56:4)         | -0.003035                     | 2.806361          |
| TG(62:13)        | -0.003028                     | 2.792418          |
| TG(56:4)         | -0.003024                     | 2.785789          |
| TG(54:8)         | -0.003021                     | 2.780300          |
| TG(52:2)         | -0.002993                     | 2.728376          |
| TG(56:9)         | -0.002981                     | 2.706544          |
| TG(62:12)        | -0.002977                     | 2.700076          |
| TG(54:6)         | -0.002967                     | 2.681043          |
| PA/PG(38:3)      | -0.002965                     | 2.677760          |
| PE(38:7)         | -0.002952                     | 2.655027          |
| TG(55:7)         | -0.002944                     | 2.640651          |
| TG(52:5)         | -0.002931                     | 2.617553          |
| TG(58:8)         | -0.002916                     | 2.589769          |

|                |           |          |
|----------------|-----------|----------|
| TG(53:3)       | -0.002909 | 2.577194 |
| TG(60:9)       | -0.002901 | 2.563514 |
| TG(56:1)       | -0.002892 | 2.547556 |
| TG(55:6)       | -0.002886 | 2.537457 |
| TG(60:7)       | -0.002876 | 2.518840 |
| TG(57:7)       | -0.002860 | 2.491226 |
| TG(56:4)       | -0.002828 | 2.435875 |
| TG(58:10)      | -0.002811 | 2.406848 |
| ChoE(20:5)     | 0.002785  | 2.363230 |
| TG(52:6)       | -0.002782 | 2.357520 |
| TG(56:5)       | -0.002774 | 2.344442 |
| TG(57:9)       | -0.002773 | 2.343017 |
| TG(60:8)       | -0.002755 | 2.311277 |
| GPE(40:4)      | 0.002749  | 2.301637 |
| TG(57:6)       | -0.002741 | 2.288619 |
| TG(54:3)       | -0.002731 | 2.271989 |
| TG(58:7)       | -0.002731 | 2.271225 |
| TG(58:5)       | -0.002727 | 2.264515 |
| ChoE(18:2)     | 0.002726  | 2.263100 |
| TG(58:2)       | -0.002723 | 2.259425 |
| TG(53:4)       | -0.002706 | 2.229896 |
| TG(62:14)      | -0.002700 | 2.220147 |
| TG(50:4)       | -0.002693 | 2.208509 |
| TG(58:11)      | -0.002691 | 2.206352 |
| TG(56:3)       | -0.002670 | 2.172224 |
| TG(58:10)      | -0.002660 | 2.154509 |
| TG(50:5)       | -0.002655 | 2.146575 |
| TG(49:3)       | 0.002647  | 2.134276 |
| TG(55:2)       | -0.002644 | 2.129675 |
| TG(56:10)      | -0.002643 | 2.128338 |
| SM(d18:1/18:2) | -0.002638 | 2.120380 |
| TG(58:11)      | -0.002632 | 2.110870 |
| PA/PG(38:3)    | -0.002623 | 2.095720 |
| TG(60:10)      | -0.002620 | 2.091126 |
| TG(58:5)       | -0.002611 | 2.076741 |
| TG(51:4)       | -0.002601 | 2.060263 |
| TG(60:8)       | -0.002600 | 2.059324 |
| TG(56:8)       | -0.002589 | 2.041091 |
| TG(60:4)       | -0.002565 | 2.003809 |
| PE(34:0)       | -0.002563 | 2.000845 |

**Table S8. Absolute concentrations  $\pm$  SEM of the significantly altered lipid molecular species ( $\mu\text{mol/g}$ ) in livers from CONV-R, CONV-D, and GF mice after a 4 h fast.**

| Lipid Name      | GF                  | Conv-R                           | Conv-D                           |
|-----------------|---------------------|----------------------------------|----------------------------------|
| Cer(d18:1/22:0) | 0.0668 $\pm$ 0.0096 | 0.1042 $\pm$ 0.0105 <sup>a</sup> | 0.1002 $\pm$ 0.0051 <sup>a</sup> |
| ChoE(18:2)      | 0.0081 $\pm$ 0.0008 | 0.0051 $\pm$ 0.0003 <sup>a</sup> | 0.0059 $\pm$ 0.0005              |
| ChoE(20:5)      | 0.0038 $\pm$ 0.0006 | 0.0013 $\pm$ 0.0002 <sup>b</sup> | 0.0020 $\pm$ 0.0002 <sup>b</sup> |
| DAG(38:5)       | 0.0009 $\pm$ 0.0001 | 0.0006 $\pm$ 0.0001              | 0.0006 $\pm$ 0.0000 <sup>a</sup> |
| GPA/GPGro(38:3) | 0.0063 $\pm$ 0.0006 | 0.0094 $\pm$ 0.0007 <sup>b</sup> | 0.0080 $\pm$ 0.0004              |
| GPA/GPGro(38:3) | 0.0020 $\pm$ 0.0002 | 0.0027 $\pm$ 0.0002 <sup>a</sup> | 0.0024 $\pm$ 0.0001              |
| GPCho(32:0e)    | 0.0051 $\pm$ 0.0005 | 0.0060 $\pm$ 0.0002              | 0.0068 $\pm$ 0.0004 <sup>a</sup> |
| GPCho(32:1)     | 0.0186 $\pm$ 0.0020 | 0.0325 $\pm$ 0.0034 <sup>b</sup> | 0.0236 $\pm$ 0.0012              |
| GPCho(38:4)     | 0.7878 $\pm$ 0.0807 | 0.5257 $\pm$ 0.0252 <sup>a</sup> | 0.6429 $\pm$ 0.0305              |
| GPCho(40:7)     | 0.0056 $\pm$ 0.0009 | 0.0032 $\pm$ 0.0003              | 0.0030 $\pm$ 0.0002 <sup>a</sup> |
| GPCho(40:7)     | 0.0044 $\pm$ 0.0007 | 0.0023 $\pm$ 0.0001 <sup>a</sup> | 0.0026 $\pm$ 0.0002              |
| GPCho(40:9)     | 0.0033 $\pm$ 0.0003 | 0.0021 $\pm$ 0.0002 <sup>b</sup> | 0.0022 $\pm$ 0.0001 <sup>b</sup> |
| GPEtn(36:2)     | 0.0174 $\pm$ 0.0018 | 0.0234 $\pm$ 0.0008 <sup>a</sup> | 0.0225 $\pm$ 0.0010              |
| GPEtn(38:5)     | 0.1388 $\pm$ 0.0158 | 0.0895 $\pm$ 0.0039 <sup>a</sup> | 0.0998 $\pm$ 0.0044              |
| GPEtn(38:7)     | 0.0185 $\pm$ 0.0021 | 0.0291 $\pm$ 0.0020 <sup>b</sup> | 0.0230 $\pm$ 0.0015              |
| GPEtn(40:4)     | 0.1474 $\pm$ 0.0185 | 0.0743 $\pm$ 0.0036 <sup>b</sup> | 0.0925 $\pm$ 0.0043 <sup>b</sup> |
| GPEtn(46:9e)    | 0.0062 $\pm$ 0.0005 | 0.0093 $\pm$ 0.0008 <sup>b</sup> | 0.0087 $\pm$ 0.0006 <sup>b</sup> |
| MAG(16:1)       | 0.0033 $\pm$ 0.0006 | 0.0019 $\pm$ 0.0001              | 0.0018 $\pm$ 0.0001 <sup>a</sup> |
| MAG(16:1)       | 0.0084 $\pm$ 0.0014 | 0.0047 $\pm$ 0.0002              | 0.0043 $\pm$ 0.0002 <sup>a</sup> |
| SM(d18:1/18:2)  | 0.0027 $\pm$ 0.0002 | 0.0037 $\pm$ 0.0003 <sup>a</sup> | 0.0032 $\pm$ 0.0001              |
| TG(46:0)        | 0.0057 $\pm$ 0.0011 | 0.0023 $\pm$ 0.0002 <sup>a</sup> | 0.0025 $\pm$ 0.0003 <sup>a</sup> |
| TG(49:3)        | 0.0289 $\pm$ 0.0043 | 0.0128 $\pm$ 0.0011 <sup>b</sup> | 0.0163 $\pm$ 0.0013 <sup>b</sup> |
| TG(50:1)        | 0.0636 $\pm$ 0.0075 | 0.1699 $\pm$ 0.0260 <sup>c</sup> | 0.1010 $\pm$ 0.0154 <sup>f</sup> |
| TG(50:2)        | 0.1290 $\pm$ 0.0167 | 0.2800 $\pm$ 0.0443 <sup>b</sup> | 0.1702 $\pm$ 0.0205 <sup>e</sup> |
| TG(50:3)        | 0.0814 $\pm$ 0.0111 | 0.1767 $\pm$ 0.0228 <sup>c</sup> | 0.1030 $\pm$ 0.0121 <sup>f</sup> |
| TG(50:4)        | 0.0308 $\pm$ 0.0044 | 0.0581 $\pm$ 0.0108 <sup>a</sup> | 0.0360 $\pm$ 0.0050              |
| TG(50:5)        | 0.0045 $\pm$ 0.0005 | 0.0082 $\pm$ 0.0017 <sup>a</sup> | 0.0048 $\pm$ 0.0007              |
| TG(51:1)        | 0.0033 $\pm$ 0.0003 | 0.0071 $\pm$ 0.0014 <sup>b</sup> | 0.0042 $\pm$ 0.0005 <sup>e</sup> |
| TG(51:2)        | 0.0143 $\pm$ 0.0015 | 0.0359 $\pm$ 0.0070 <sup>b</sup> | 0.0197 $\pm$ 0.0026 <sup>c</sup> |
| TG(51:3)        | 0.0252 $\pm$ 0.0032 | 0.0539 $\pm$ 0.0098 <sup>b</sup> | 0.0330 $\pm$ 0.0040              |
| TG(51:4)        | 0.0115 $\pm$ 0.0017 | 0.0224 $\pm$ 0.0048 <sup>a</sup> | 0.0149 $\pm$ 0.0021              |
| TG(52:1)        | 0.0200 $\pm$ 0.0020 | 0.0525 $\pm$ 0.0122 <sup>b</sup> | 0.0297 $\pm$ 0.0035 <sup>c</sup> |
| TG(52:2)        | 0.4596 $\pm$ 0.0677 | 0.9074 $\pm$ 0.1332 <sup>b</sup> | 0.6051 $\pm$ 0.0607              |
| TG(52:5)        | 0.1179 $\pm$ 0.0159 | 0.2733 $\pm$ 0.0480 <sup>b</sup> | 0.1897 $\pm$ 0.0299              |
| TG(52:5)        | 0.0266 $\pm$ 0.0075 | 0.0689 $\pm$ 0.0113 <sup>a</sup> | 0.0380 $\pm$ 0.0124              |
| TG(52:6)        | 0.0130 $\pm$ 0.0017 | 0.0293 $\pm$ 0.0070 <sup>a</sup> | 0.0163 $\pm$ 0.0025              |
| TG(52:7)        | 0.0030 $\pm$ 0.0003 | 0.0052 $\pm$ 0.0011 <sup>a</sup> | 0.0025 $\pm$ 0.0003 <sup>d</sup> |
| TG(53:1)        | 0.0014 $\pm$ 0.0002 | 0.0024 $\pm$ 0.0005 <sup>a</sup> | 0.0014 $\pm$ 0.0002              |
| TG(53:2)        | 0.0070 $\pm$ 0.0008 | 0.0193 $\pm$ 0.0038 <sup>c</sup> | 0.0100 $\pm$ 0.0013 <sup>f</sup> |
| TG(53:3)        | 0.0180 $\pm$ 0.0023 | 0.0445 $\pm$ 0.0107 <sup>b</sup> | 0.0253 $\pm$ 0.0035              |
| TG(53:4)        | 0.0162 $\pm$ 0.0022 | 0.0307 $\pm$ 0.0058 <sup>a</sup> | 0.0210 $\pm$ 0.0028              |
| TG(54:1)        | 0.0061 $\pm$ 0.0006 | 0.0173 $\pm$ 0.0038 <sup>b</sup> | 0.0086 $\pm$ 0.0010 <sup>c</sup> |
| TG(54:2)        | 0.0333 $\pm$ 0.0039 | 0.1049 $\pm$ 0.0265 <sup>b</sup> | 0.0458 $\pm$ 0.0055 <sup>e</sup> |
| TG(54:3)        | 0.1439 $\pm$ 0.0179 | 0.2453 $\pm$ 0.0359 <sup>a</sup> | 0.1792 $\pm$ 0.0193              |
| TG(54:5)        | 0.0635 $\pm$ 0.0073 | 0.1353 $\pm$ 0.0234 <sup>b</sup> | 0.0816 $\pm$ 0.0137              |
| TG(54:6)        | 0.1006 $\pm$ 0.0128 | 0.2000 $\pm$ 0.0341 <sup>a</sup> | 0.1317 $\pm$ 0.0204              |

|           |                 |                              |                              |
|-----------|-----------------|------------------------------|------------------------------|
| TG(54:7)  | 0.0691 ± 0.0093 | 0.1831 ± 0.0340 <sup>b</sup> | 0.0965 ± 0.0161 <sup>e</sup> |
| TG(54:7)  | 0.0266 ± 0.0035 | 0.0617 ± 0.0186 <sup>a</sup> | 0.0364 ± 0.0050              |
| TG(54:8)  | 0.0142 ± 0.0018 | 0.0327 ± 0.0066 <sup>b</sup> | 0.0145 ± 0.0014 <sup>e</sup> |
| TG(55:2)  | 0.0013 ± 0.0002 | 0.0025 ± 0.0005 <sup>a</sup> | 0.0014 ± 0.0002 <sup>d</sup> |
| TG(55:3)  | 0.0026 ± 0.0003 | 0.0051 ± 0.0009 <sup>b</sup> | 0.0030 ± 0.0004 <sup>e</sup> |
| TG(55:6)  | 0.0023 ± 0.0002 | 0.0044 ± 0.0008 <sup>b</sup> | 0.0025 ± 0.0002 <sup>e</sup> |
| TG(55:7)  | 0.0057 ± 0.0007 | 0.0120 ± 0.0023 <sup>b</sup> | 0.0060 ± 0.0005 <sup>e</sup> |
| TG(55:8)  | 0.0064 ± 0.0009 | 0.0119 ± 0.0028 <sup>a</sup> | 0.0061 ± 0.0005 <sup>d</sup> |
| TG(56:1)  | 0.0012 ± 0.0001 | 0.0028 ± 0.0006 <sup>b</sup> | 0.0014 ± 0.0001 <sup>e</sup> |
| TG(56:10) | 0.0039 ± 0.0005 | 0.0079 ± 0.0018 <sup>a</sup> | 0.0037 ± 0.0004 <sup>d</sup> |
| TG(56:2)  | 0.0037 ± 0.0004 | 0.0088 ± 0.0014 <sup>c</sup> | 0.0048 ± 0.0006 <sup>f</sup> |
| TG(56:2)  | 0.0046 ± 0.0005 | 0.0125 ± 0.0025 <sup>c</sup> | 0.0060 ± 0.0007 <sup>f</sup> |
| TG(56:3)  | 0.0137 ± 0.0016 | 0.0364 ± 0.0069 <sup>c</sup> | 0.0190 ± 0.0023 <sup>f</sup> |
| TG(56:3)  | 0.0062 ± 0.0008 | 0.0104 ± 0.0015 <sup>a</sup> | 0.0072 ± 0.0008              |
| TG(56:4)  | 0.0050 ± 0.0006 | 0.0109 ± 0.0021 <sup>b</sup> | 0.0070 ± 0.0009              |
| TG(56:4)  | 0.0200 ± 0.0027 | 0.0403 ± 0.0064 <sup>b</sup> | 0.0264 ± 0.0034              |
| TG(56:4)  | 0.0017 ± 0.0002 | 0.0032 ± 0.0006 <sup>a</sup> | 0.0022 ± 0.0002              |
| TG(56:5)  | 0.0182 ± 0.0023 | 0.0396 ± 0.0068 <sup>b</sup> | 0.0273 ± 0.0035              |
| TG(56:5)  | 0.0155 ± 0.0020 | 0.0250 ± 0.0025 <sup>a</sup> | 0.0176 ± 0.0019              |
| TG(56:5)  | 0.0201 ± 0.0027 | 0.0325 ± 0.0044 <sup>a</sup> | 0.0236 ± 0.0025              |
| TG(56:6)  | 0.0659 ± 0.0085 | 0.1961 ± 0.0281 <sup>c</sup> | 0.1090 ± 0.0150 <sup>f</sup> |
| TG(56:7)  | 0.1044 ± 0.0141 | 0.2636 ± 0.0403 <sup>c</sup> | 0.1655 ± 0.0178 <sup>f</sup> |
| TG(56:7)  | 0.2635 ± 0.0507 | 0.4702 ± 0.0657 <sup>a</sup> | 0.2729 ± 0.0254              |
| TG(56:8)  | 0.4920 ± 0.0863 | 0.8782 ± 0.1237 <sup>a</sup> | 0.5430 ± 0.0444              |
| TG(56:9)  | 0.0334 ± 0.0047 | 0.1040 ± 0.0280 <sup>b</sup> | 0.0389 ± 0.0036 <sup>e</sup> |
| TG(57:6)  | 0.0012 ± 0.0001 | 0.0020 ± 0.0003 <sup>a</sup> | 0.0013 ± 0.0001 <sup>d</sup> |
| TG(57:7)  | 0.0029 ± 0.0004 | 0.0054 ± 0.0009 <sup>b</sup> | 0.0031 ± 0.0003 <sup>e</sup> |
| TG(57:9)  | 0.0028 ± 0.0004 | 0.0058 ± 0.0012 <sup>b</sup> | 0.0029 ± 0.0002 <sup>e</sup> |
| TG(58:10) | 0.0116 ± 0.0013 | 0.0226 ± 0.0045 <sup>b</sup> | 0.0138 ± 0.0010              |
| TG(58:10) | 0.0393 ± 0.0064 | 0.0901 ± 0.0229 <sup>a</sup> | 0.0453 ± 0.0032 <sup>d</sup> |
| TG(58:11) | 0.0050 ± 0.0006 | 0.0094 ± 0.0019 <sup>b</sup> | 0.0046 ± 0.0004 <sup>e</sup> |
| TG(58:11) | 0.0103 ± 0.0015 | 0.0228 ± 0.0058 <sup>a</sup> | 0.0114 ± 0.0009 <sup>d</sup> |
| TG(58:2)  | 0.0010 ± 0.0001 | 0.0021 ± 0.0005 <sup>a</sup> | 0.0011 ± 0.0001 <sup>d</sup> |
| TG(58:3)  | 0.0020 ± 0.0002 | 0.0044 ± 0.0007 <sup>b</sup> | 0.0024 ± 0.0003 <sup>d</sup> |
| TG(58:3)  | 0.0011 ± 0.0002 | 0.0020 ± 0.0004 <sup>a</sup> | 0.0011 ± 0.0001 <sup>e</sup> |
| TG(58:4)  | 0.0030 ± 0.0004 | 0.0068 ± 0.0010 <sup>b</sup> | 0.0039 ± 0.0005 <sup>d</sup> |
| TG(58:5)  | 0.0030 ± 0.0004 | 0.0053 ± 0.0009 <sup>a</sup> | 0.0032 ± 0.0003 <sup>e</sup> |
| TG(58:5)  | 0.0019 ± 0.0003 | 0.0036 ± 0.0008 <sup>a</sup> | 0.0021 ± 0.0003 <sup>d</sup> |
| TG(58:6)  | 0.0056 ± 0.0008 | 0.0087 ± 0.0011 <sup>a</sup> | 0.0061 ± 0.0007              |
| TG(58:7)  | 0.0073 ± 0.0008 | 0.0167 ± 0.0027 <sup>c</sup> | 0.0096 ± 0.0006 <sup>f</sup> |
| TG(58:7)  | 0.0136 ± 0.0019 | 0.0228 ± 0.0027 <sup>a</sup> | 0.0152 ± 0.0014              |
| TG(58:7)  | 0.0082 ± 0.0011 | 0.0130 ± 0.0017 <sup>a</sup> | 0.0085 ± 0.0008              |
| TG(58:8)  | 0.0398 ± 0.0058 | 0.0880 ± 0.0178 <sup>b</sup> | 0.0466 ± 0.0034 <sup>e</sup> |
| TG(58:9)  | 0.0727 ± 0.0109 | 0.1749 ± 0.0239 <sup>c</sup> | 0.1035 ± 0.0107 <sup>f</sup> |
| TG(60:10) | 0.0049 ± 0.0006 | 0.0101 ± 0.0018 <sup>b</sup> | 0.0055 ± 0.0005 <sup>e</sup> |
| TG(60:10) | 0.0066 ± 0.0008 | 0.0117 ± 0.0021 <sup>a</sup> | 0.0073 ± 0.0006              |
| TG(60:11) | 0.0102 ± 0.0013 | 0.0272 ± 0.0053 <sup>c</sup> | 0.0135 ± 0.0013 <sup>f</sup> |
| TG(60:11) | 0.0025 ± 0.0004 | 0.0071 ± 0.0015 <sup>b</sup> | 0.0029 ± 0.0008 <sup>e</sup> |
| TG(60:12) | 0.0122 ± 0.0019 | 0.0344 ± 0.0071 <sup>c</sup> | 0.0150 ± 0.0011 <sup>f</sup> |
| TG(60:4)  | 0.0008 ± 0.0001 | 0.0012 ± 0.0002 <sup>a</sup> | 0.0008 ± 0.0001              |

|           |                 |                              |                              |
|-----------|-----------------|------------------------------|------------------------------|
| TG(60:6)  | 0.0008 ± 0.0001 | 0.0012 ± 0.0001 <sup>b</sup> | 0.0008 ± 0.0001 <sup>c</sup> |
| TG(60:7)  | 0.0016 ± 0.0002 | 0.0033 ± 0.0006 <sup>b</sup> | 0.0017 ± 0.0001 <sup>e</sup> |
| TG(60:8)  | 0.0033 ± 0.0005 | 0.0060 ± 0.0008 <sup>b</sup> | 0.0034 ± 0.0003 <sup>e</sup> |
| TG(60:8)  | 0.0029 ± 0.0004 | 0.0045 ± 0.0005 <sup>a</sup> | 0.0029 ± 0.0003 <sup>d</sup> |
| TG(60:9)  | 0.0056 ± 0.0007 | 0.0102 ± 0.0014 <sup>b</sup> | 0.0063 ± 0.0004 <sup>e</sup> |
| TG(62:10) | 0.0010 ± 0.0001 | 0.0014 ± 0.0002 <sup>a</sup> | 0.0010 ± 0.0001              |
| TG(62:12) | 0.0014 ± 0.0002 | 0.0030 ± 0.0003 <sup>c</sup> | 0.0016 ± 0.0001 <sup>f</sup> |
| TG(62:12) | 0.0027 ± 0.0003 | 0.0055 ± 0.0010 <sup>b</sup> | 0.0028 ± 0.0002 <sup>e</sup> |
| TG(62:13) | 0.0059 ± 0.0008 | 0.0131 ± 0.0025 <sup>b</sup> | 0.0065 ± 0.0004 <sup>e</sup> |
| TG(62:14) | 0.0096 ± 0.0013 | 0.0184 ± 0.0036 <sup>b</sup> | 0.0094 ± 0.0006 <sup>e</sup> |
| TG(62:8)  | 0.0007 ± 0.0001 | 0.0013 ± 0.0002 <sup>b</sup> | 0.0008 ± 0.0001 <sup>c</sup> |

<sup>a</sup> p - Value < 0.05 vs GF

<sup>b</sup> p - Value < 0.01 vs GF

<sup>c</sup> p - Value < 0.001 vs GF

<sup>d</sup> p - Value < 0.05 CONV-R vs CONV-D

<sup>e</sup> p - Value < 0.01 CONV-R vs CONV-D

<sup>f</sup> p - Value < 0.001 CONV-R vs CONV-D

q - Value < 0.20



**Table S9. Absolute concentrations  $\pm$  SEM of the significantly altered lipid molecular species ( $\mu\text{mol/ml}$ ) in serum from CONV-R and GF mice 1 h after a lipid bolus**

| <b>Lipid Name</b> | <b>GF</b>           | <b>Conv-R</b>       | <b>P-value</b> |
|-------------------|---------------------|---------------------|----------------|
| DG(44:7)          | 0.0171 $\pm$ 0.0004 | 0.0133 $\pm$ 0.0005 | 0.00009        |
| LysoPC(16:0)      | 0.0151 $\pm$ 0.0005 | 0.0207 $\pm$ 0.0017 | 0.00277        |
| LysoPC(16:0)      | 0.1892 $\pm$ 0.0105 | 0.2719 $\pm$ 0.0262 | 0.00579        |
| LysoPC(18:1)      | 0.0286 $\pm$ 0.0019 | 0.0416 $\pm$ 0.0048 | 0.01321        |
| LysoPC(18:2)      | 0.1204 $\pm$ 0.0071 | 0.1531 $\pm$ 0.0146 | 0.04554        |
| LysoPC(18:2)      | 0.0180 $\pm$ 0.0008 | 0.0221 $\pm$ 0.0011 | 0.00888        |
| LysoPC(18:3)      | 0.0237 $\pm$ 0.0023 | 0.0344 $\pm$ 0.0045 | 0.03734        |
| LysoPC(20:4)      | 0.0044 $\pm$ 0.0002 | 0.0056 $\pm$ 0.0005 | 0.02733        |
| LysoPC(20:4)      | 0.0041 $\pm$ 0.0003 | 0.0060 $\pm$ 0.0005 | 0.00420        |
| LysoPC(20:4)      | 0.0299 $\pm$ 0.0018 | 0.0469 $\pm$ 0.0060 | 0.00718        |
| LysoPC(20:3e)     | 0.0074 $\pm$ 0.0008 | 0.0129 $\pm$ 0.0016 | 0.00595        |
| LysoPS(21:1)      | 0.0037 $\pm$ 0.0002 | 0.0065 $\pm$ 0.0009 | 0.00271        |
| PC(32:0)          | 0.0218 $\pm$ 0.0009 | 0.0323 $\pm$ 0.0014 | 0.00003        |
| PC(32:1)          | 0.0058 $\pm$ 0.0003 | 0.0087 $\pm$ 0.0005 | 0.00020        |
| PC(32:2)          | 0.0028 $\pm$ 0.0001 | 0.0035 $\pm$ 0.0003 | 0.03041        |
| PC(34:1)          | 0.1793 $\pm$ 0.0077 | 0.2189 $\pm$ 0.0139 | 0.01959        |
| PC(34:3)          | 0.0036 $\pm$ 0.0001 | 0.0052 $\pm$ 0.0004 | 0.00143        |
| PC(34:4)          | 0.0016 $\pm$ 0.0001 | 0.0023 $\pm$ 0.0003 | 0.04047        |
| PC(36:2)          | 0.6479 $\pm$ 0.0251 | 0.5012 $\pm$ 0.0136 | 0.00119        |
| PC(36:3)          | 0.0963 $\pm$ 0.0031 | 0.1310 $\pm$ 0.0056 | 0.00010        |
| PC(36:4)          | 0.0276 $\pm$ 0.0017 | 0.0339 $\pm$ 0.0019 | 0.03184        |
| PC(36:4)          | 0.1969 $\pm$ 0.0104 | 0.3366 $\pm$ 0.0227 | 0.00005        |
| PC(38:3)          | 0.0331 $\pm$ 0.0009 | 0.0421 $\pm$ 0.0016 | 0.00028        |
| PC(38:4)          | 0.0065 $\pm$ 0.0003 | 0.0103 $\pm$ 0.0003 | 0.00001        |
| PC(38:5)          | 0.0969 $\pm$ 0.0040 | 0.0740 $\pm$ 0.0052 | 0.00457        |
| PC(38:5)          | 0.0250 $\pm$ 0.0009 | 0.0373 $\pm$ 0.0025 | 0.00018        |
| PC(38:6)          | 0.0211 $\pm$ 0.0010 | 0.0248 $\pm$ 0.0013 | 0.04772        |
| PC(38:7)          | 0.0291 $\pm$ 0.0015 | 0.0467 $\pm$ 0.0029 | 0.00008        |
| PC(40:7)          | 0.0223 $\pm$ 0.0005 | 0.0266 $\pm$ 0.0012 | 0.00229        |
| PC(40:8)          | 0.0042 $\pm$ 0.0002 | 0.0060 $\pm$ 0.0007 | 0.00776        |
| PC(42:10)         | 0.0036 $\pm$ 0.0002 | 0.0043 $\pm$ 0.0002 | 0.02710        |
| PC(42:9)          | 0.0166 $\pm$ 0.0008 | 0.0133 $\pm$ 0.0008 | 0.02359        |
| PC(36:4e)         | 0.0053 $\pm$ 0.0002 | 0.0071 $\pm$ 0.0004 | 0.00160        |
| PC(36:5e)         | 0.0032 $\pm$ 0.0003 | 0.0048 $\pm$ 0.0006 | 0.02081        |
| PC(38:5e)         | 0.0053 $\pm$ 0.0003 | 0.0066 $\pm$ 0.0002 | 0.00583        |
| PE(36:0)          | 0.0136 $\pm$ 0.0017 | 0.0262 $\pm$ 0.0043 | 0.00861        |
| PE(42:6)          | 0.0538 $\pm$ 0.0035 | 0.0712 $\pm$ 0.0075 | 0.03641        |
| PE(38:7e)         | 0.0189 $\pm$ 0.0012 | 0.0279 $\pm$ 0.0032 | 0.01000        |
| PE(42:10e)        | 0.0362 $\pm$ 0.0019 | 0.0513 $\pm$ 0.0043 | 0.00365        |
| PE(46:12e)        | 0.0702 $\pm$ 0.0039 | 0.1025 $\pm$ 0.0151 | 0.02665        |
| PS(43:8)          | 0.0307 $\pm$ 0.0017 | 0.0514 $\pm$ 0.0060 | 0.00194        |
| PS(43:9)          | 0.0651 $\pm$ 0.0041 | 0.1181 $\pm$ 0.0146 | 0.00132        |
| SM(d18:1/22:0)    | 0.0099 $\pm$ 0.0003 | 0.0066 $\pm$ 0.0005 | 0.00011        |
| SM(d18:1/24:1)    | 0.0140 $\pm$ 0.0006 | 0.0165 $\pm$ 0.0011 | 0.04628        |
| TG(46:0)          | 0.1195 $\pm$ 0.0130 | 0.1839 $\pm$ 0.0308 | 0.04800        |
| TG(47:0)          | 0.0206 $\pm$ 0.0018 | 0.0346 $\pm$ 0.0064 | 0.02670        |
| TG(48:0)          | 0.0863 $\pm$ 0.0095 | 0.1472 $\pm$ 0.0290 | 0.03542        |

|          |                 |                 |         |
|----------|-----------------|-----------------|---------|
| TG(49:1) | 0.0233 ± 0.0020 | 0.0346 ± 0.0051 | 0.03449 |
| TG(52:6) | 0.0280 ± 0.0023 | 0.0191 ± 0.0017 | 0.01695 |

q – Value < 0.30

**Table S10. Absolute concentrations  $\pm$  SEM of the significantly altered lipid molecular species ( $\mu\text{mol/ml}$ ) in serum from CONV-R and GF mice 4 h after a lipid bolus**

| Lipid Name     | GF                  | Conv-R              | P-value |
|----------------|---------------------|---------------------|---------|
| LysoPC(16:0)   | 0.0189 $\pm$ 0.0013 | 0.0248 $\pm$ 0.0017 | 0.0160  |
| LysoPC(20:3e)  | 0.0117 $\pm$ 0.0011 | 0.0168 $\pm$ 0.0017 | 0.0271  |
| PC(32:0)       | 0.0252 $\pm$ 0.0008 | 0.0343 $\pm$ 0.0031 | 0.0080  |
| PC(32:1)       | 0.0133 $\pm$ 0.0004 | 0.0168 $\pm$ 0.0012 | 0.0137  |
| PC(36:3)       | 0.1065 $\pm$ 0.0037 | 0.1258 $\pm$ 0.0082 | 0.0379  |
| PC(36:4)       | 0.1678 $\pm$ 0.0081 | 0.2229 $\pm$ 0.0101 | 0.0015  |
| PC(38:3)       | 0.0290 $\pm$ 0.0020 | 0.0376 $\pm$ 0.0024 | 0.0202  |
| PC(38:4)       | 0.0058 $\pm$ 0.0004 | 0.0078 $\pm$ 0.0007 | 0.0279  |
| PC(38:5)       | 0.0190 $\pm$ 0.0006 | 0.0241 $\pm$ 0.0017 | 0.0101  |
| PC(38:7)       | 0.0258 $\pm$ 0.0013 | 0.0344 $\pm$ 0.0021 | 0.0046  |
| PC(40:6)       | 0.0807 $\pm$ 0.0045 | 0.0638 $\pm$ 0.0037 | 0.0209  |
| PC(40:7)       | 0.0115 $\pm$ 0.0003 | 0.0143 $\pm$ 0.0012 | 0.0297  |
| PC(40:8)       | 0.0027 $\pm$ 0.0001 | 0.0035 $\pm$ 0.0003 | 0.0192  |
| PC(42:9)       | 0.0124 $\pm$ 0.0007 | 0.0094 $\pm$ 0.0004 | 0.0093  |
| PC(36:4e)      | 0.0045 $\pm$ 0.0001 | 0.0062 $\pm$ 0.0004 | 0.0012  |
| PC(36:5e)      | 0.0021 $\pm$ 0.0002 | 0.0038 $\pm$ 0.0007 | 0.0260  |
| PE(36:0)       | 0.0246 $\pm$ 0.0020 | 0.0458 $\pm$ 0.0054 | 0.0019  |
| PE(36:1)       | 0.0462 $\pm$ 0.0097 | 0.1243 $\pm$ 0.0318 | 0.0218  |
| PE(36:1)       | 0.0702 $\pm$ 0.0057 | 0.1381 $\pm$ 0.0230 | 0.0073  |
| PE(36:2)       | 0.0635 $\pm$ 0.0054 | 0.0851 $\pm$ 0.0083 | 0.0447  |
| PE(40:4)       | 0.0183 $\pm$ 0.0021 | 0.0315 $\pm$ 0.0047 | 0.0170  |
| PE(42:6)       | 0.0399 $\pm$ 0.0044 | 0.0707 $\pm$ 0.0123 | 0.0234  |
| PE(44:11)      | 0.0337 $\pm$ 0.0077 | 0.0859 $\pm$ 0.0235 | 0.0362  |
| PE(38:7e)      | 0.0162 $\pm$ 0.0014 | 0.0298 $\pm$ 0.0036 | 0.0025  |
| PE(40:7e)      | 0.0118 $\pm$ 0.0013 | 0.0230 $\pm$ 0.0022 | 0.0010  |
| PE(42:10e)     | 0.0362 $\pm$ 0.0043 | 0.0714 $\pm$ 0.0154 | 0.0284  |
| PE(44:11e)     | 0.0600 $\pm$ 0.0076 | 0.1081 $\pm$ 0.0219 | 0.0393  |
| PS(38:0)       | 0.0210 $\pm$ 0.0014 | 0.0338 $\pm$ 0.0054 | 0.0232  |
| PS(38:1)       | 0.0182 $\pm$ 0.0018 | 0.0324 $\pm$ 0.0063 | 0.0321  |
| PS(41:7)       | 0.1711 $\pm$ 0.0402 | 0.4492 $\pm$ 0.1271 | 0.0371  |
| PS(43:8)       | 0.0338 $\pm$ 0.0037 | 0.0639 $\pm$ 0.0118 | 0.0184  |
| PS(43:9)       | 0.0565 $\pm$ 0.0042 | 0.1121 $\pm$ 0.0191 | 0.0072  |
| PS(45:9)       | 0.0415 $\pm$ 0.0038 | 0.0672 $\pm$ 0.0124 | 0.0446  |
| PS(38:5e)      | 0.0796 $\pm$ 0.0103 | 0.1997 $\pm$ 0.0434 | 0.0102  |
| PS(44:6e)      | 0.0322 $\pm$ 0.0027 | 0.0596 $\pm$ 0.0124 | 0.0293  |
| SM(d18:1/16:0) | 0.0153 $\pm$ 0.0006 | 0.0204 $\pm$ 0.0019 | 0.0143  |
| SM(d18:1/18:3) | 0.0040 $\pm$ 0.0002 | 0.0053 $\pm$ 0.0005 | 0.0170  |
| SM(d18:1/22:0) | 0.0065 $\pm$ 0.0004 | 0.0045 $\pm$ 0.0006 | 0.0169  |
| SM(d18:1/24:1) | 0.0082 $\pm$ 0.0005 | 0.0119 $\pm$ 0.0012 | 0.0085  |
| TG(36:0)       | 0.0060 $\pm$ 0.0009 | 0.0126 $\pm$ 0.0030 | 0.0346  |
| TG(38:0)       | 0.0102 $\pm$ 0.0016 | 0.0200 $\pm$ 0.0035 | 0.0167  |

q – Value < 0.30

SI Fig. 1.

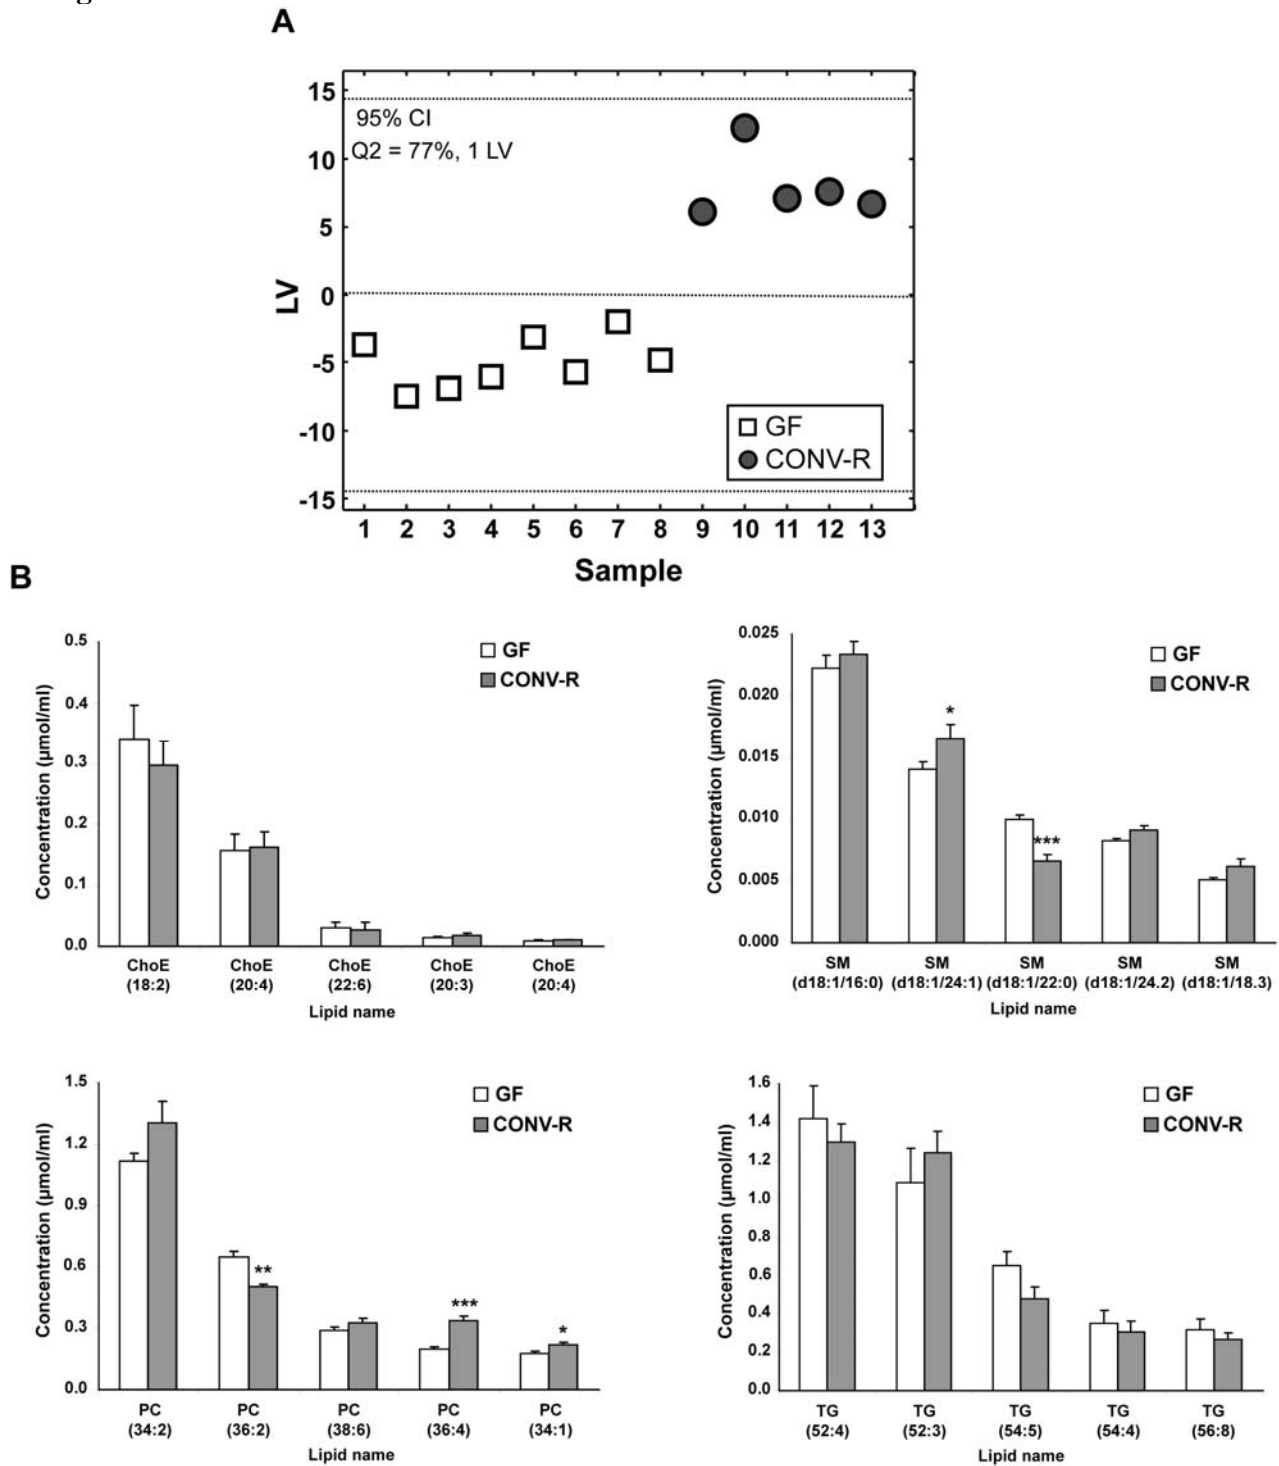

**Figure S1. Lipidomic profiling of serum from CONV-R and GF mice 1 h after a lipid bolus.** (A) Partial least squares discriminant analysis (PLS/DA) of serum 1 h after mice were gavaged with an intragastric bolus of heavy whipping cream (~36% triglycerides). Scores for latent variable LV1 and sample are depicted. (B) Absolute concentrations of the most abundant cholesteryl esters (ChoE), phosphatidylcholines (PC), sphingomyelins (SM), and triglycerides (TG) in serum of GF and CONV-R mice 1 h after administration of lipid bolus. Mean values  $\pm$  SEM are plotted. \*,  $p < 0.05$ ; \*\*,  $p < 0.01$ ; and \*\*\*,  $p < 0.001$  compared with GF.

SI Fig. 2.

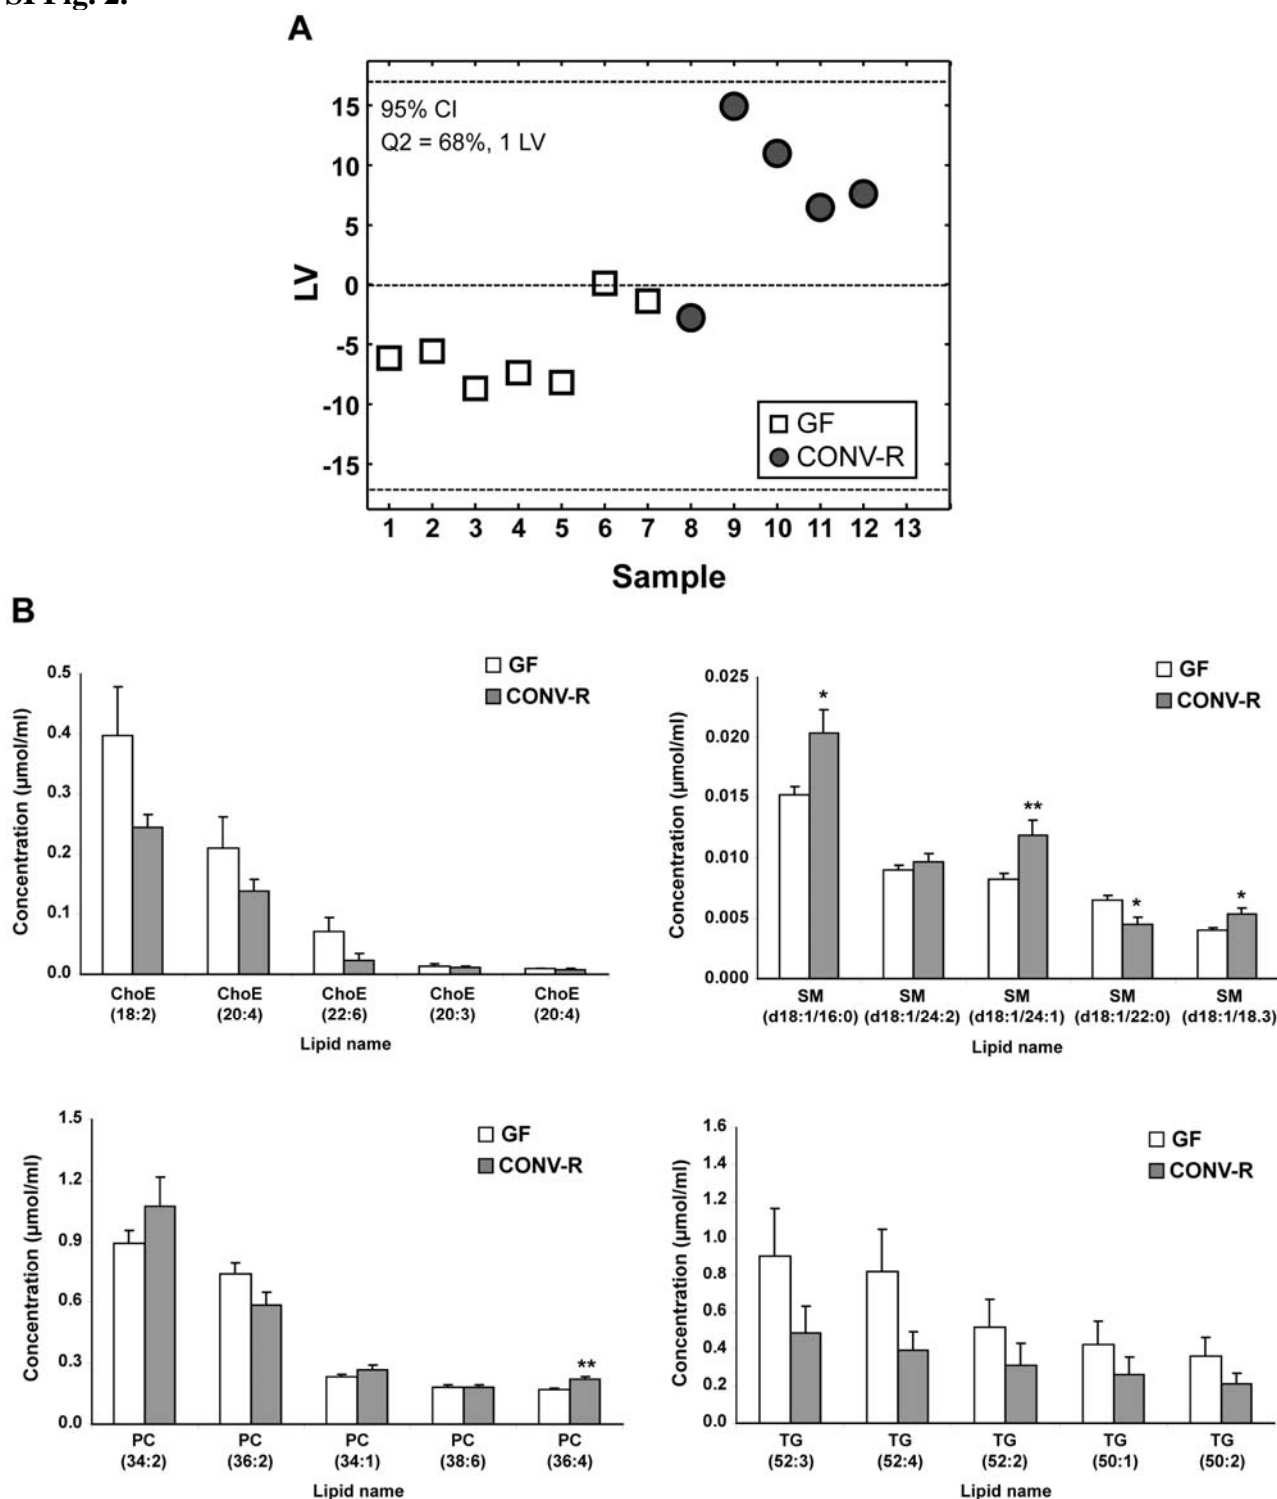

**Figure S2. Lipidomic profiling of serum from CONV-R and GF mice 4 h after a lipid bolus.** (A) Partial least squares discriminant analysis (PLS/DA) of serum 4 h after mice were gavaged with an intragastric bolus of heavy whipping cream (~36% triglycerides). Scores for latent variable LV1 and sample are depicted. (B) Absolute concentrations of the most abundant cholesteryl esters (ChoE), phosphatidylcholines (PC), sphingomyelins (SM), and triglycerides (TG) in serum of GF and CONV-R mice 1h after administration of lipid bolus. Mean values  $\pm$  SEM are plotted. \*,  $p < 0.05$  and \*\*,  $p < 0.01$  compared with GF.

SI Fig. 3.

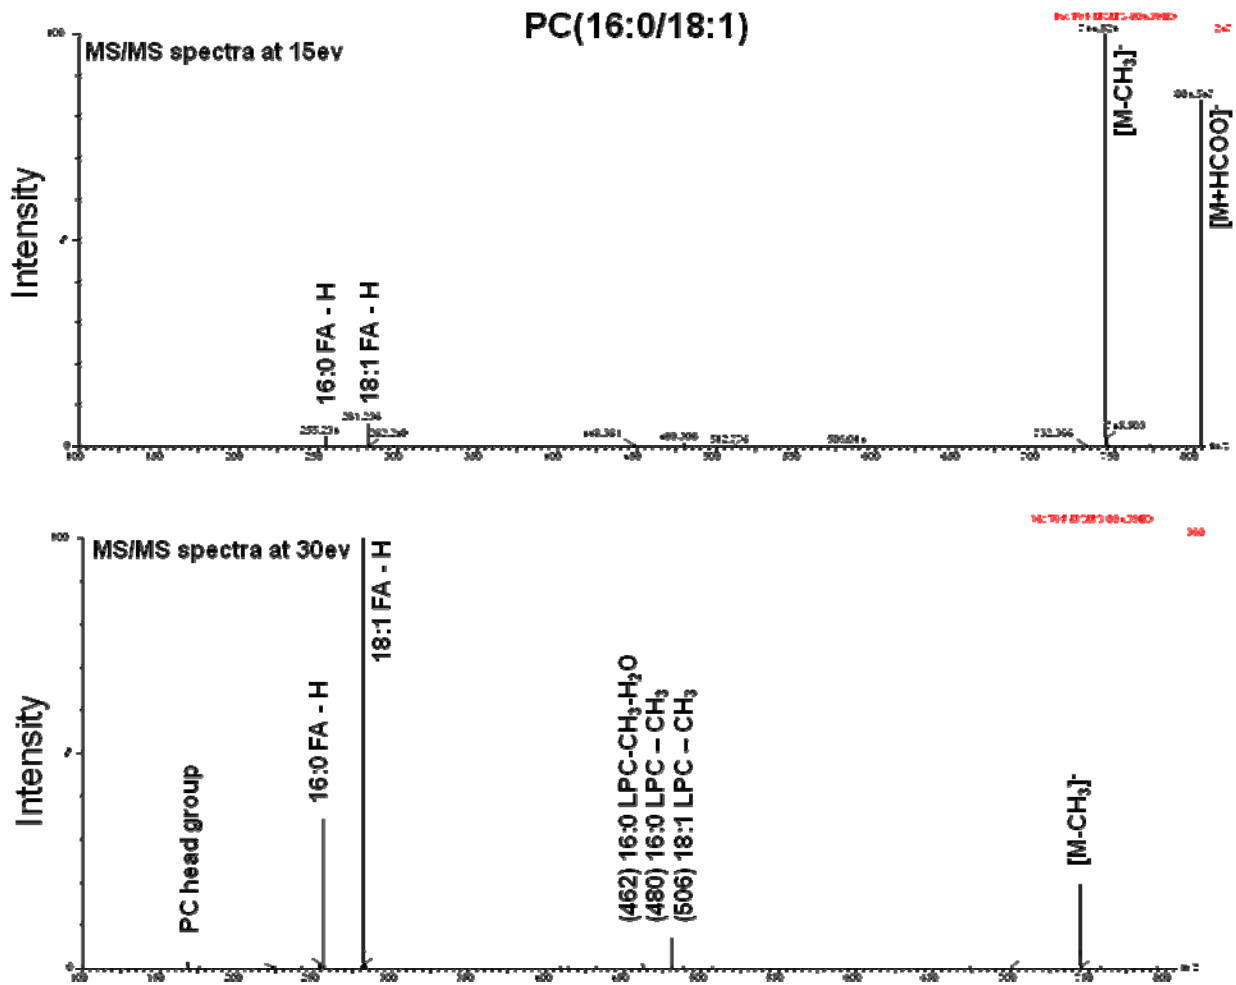

**Figure S3. Identification of lipid sub-species by tandem mass spectrometry.** MS/MS spectra of PC(34:1) at (A) 15 eV and at (B) 30 eV collision energy and the fatty acyl chains are identified as PC(16.0/18:1).
